# Supplementary material for: Fear Conditioning Downregulates Rac1 Activity in the Basolateral Amygdala Astrocytes to Facilitate the Formation of Fear Memory
Source: PubMed Central journal article supplement (PMC5712045; doi:10.3389/fnmol.2017.00396), 2017-11-27
Supplement: Presentation_1.pdf [file Presentation_1.pdf]

*Supplementary Material*

**Fear Conditioning Downregulates Rac1 Activity in the Basolateral Amygdala Astrocytes to Facilitate the Formation of Fear Memory**

Zhaohui Liao\*, Yezheng Tao\*, Xiaomu Guo, Deqin Cheng, Feifei Wang, Xing Liu, Lan Ma<sup>#</sup>

\* Co-first author

<sup>#</sup> Correspondence: Lan Ma, [lanma@fudan.edu.cn](mailto:lanma@fudan.edu.cn)

**Supplementary Figures**

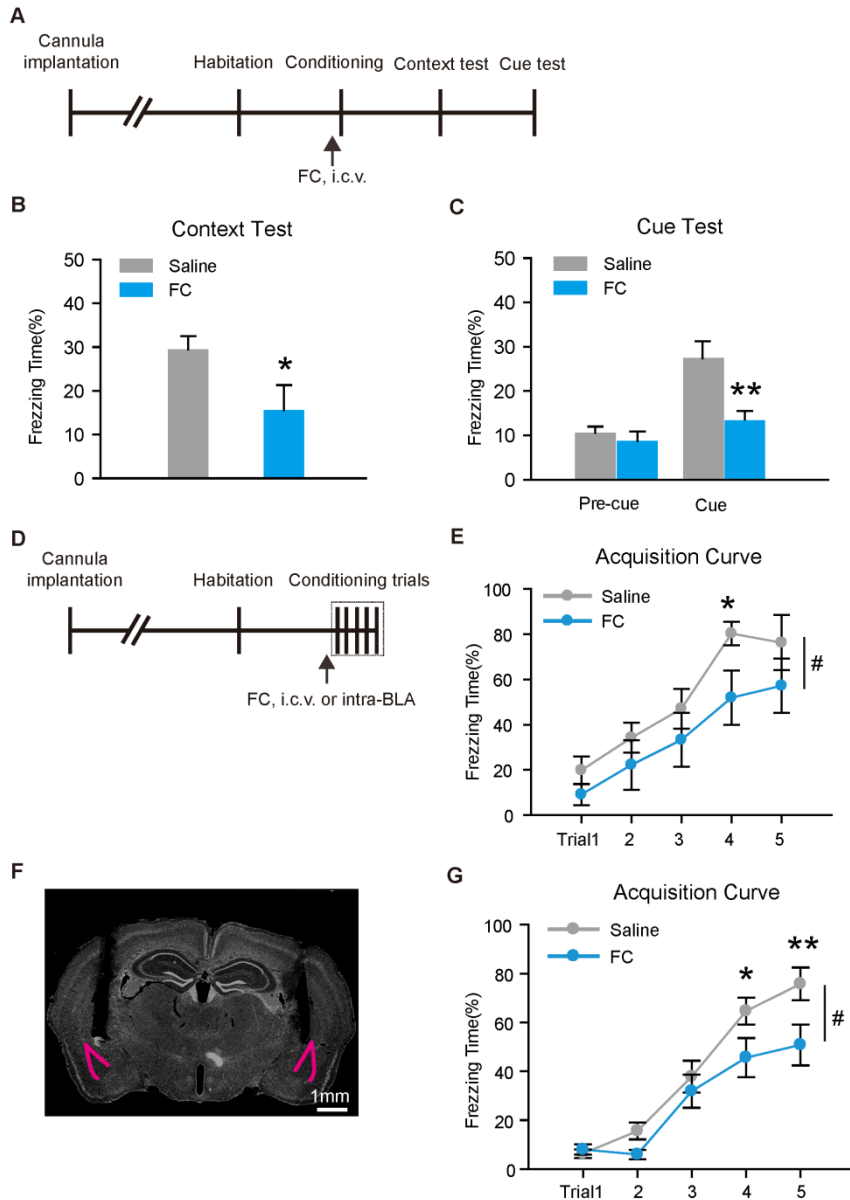

**Figure S1.** Fluorocitrate impaired the formation of conditioned fear memory. **(A)** Experimental design. An intracerebroventricular (i.c.v.) injection of fluorocitrate (1 nmol) before a single CS-US paired conditioning trial. FC, fluorocitrate. **(B, C)** Fluorocitrate decreased freezing levels in contextual **(B)** and cued **(C)** memory tests (Saline:  $n = 10$ , FC:  $n = 8$ ). **(D)** Experimental design. Five CS-US paired conditioning trials were conducted. BLA, basolateral amygdala. **(E)** Intracerebroventricular injection of fluorocitrate attenuated fear memory acquisition and decreased freezing levels (Saline:  $n = 10$ , FC:  $n = 8$ ). **(F)** A representative image of cannula implantation into BLA. **(G)** Intra-BLA injection of fluorocitrate attenuated fear memory acquisition and decreased freezing levels (Saline:  $n = 14$ , FC:  $n = 16$ ). \* $p < 0.05$ , \*\* $p < 0.01$ , # $p < 0.05$ . Scale bar, 1 mm.

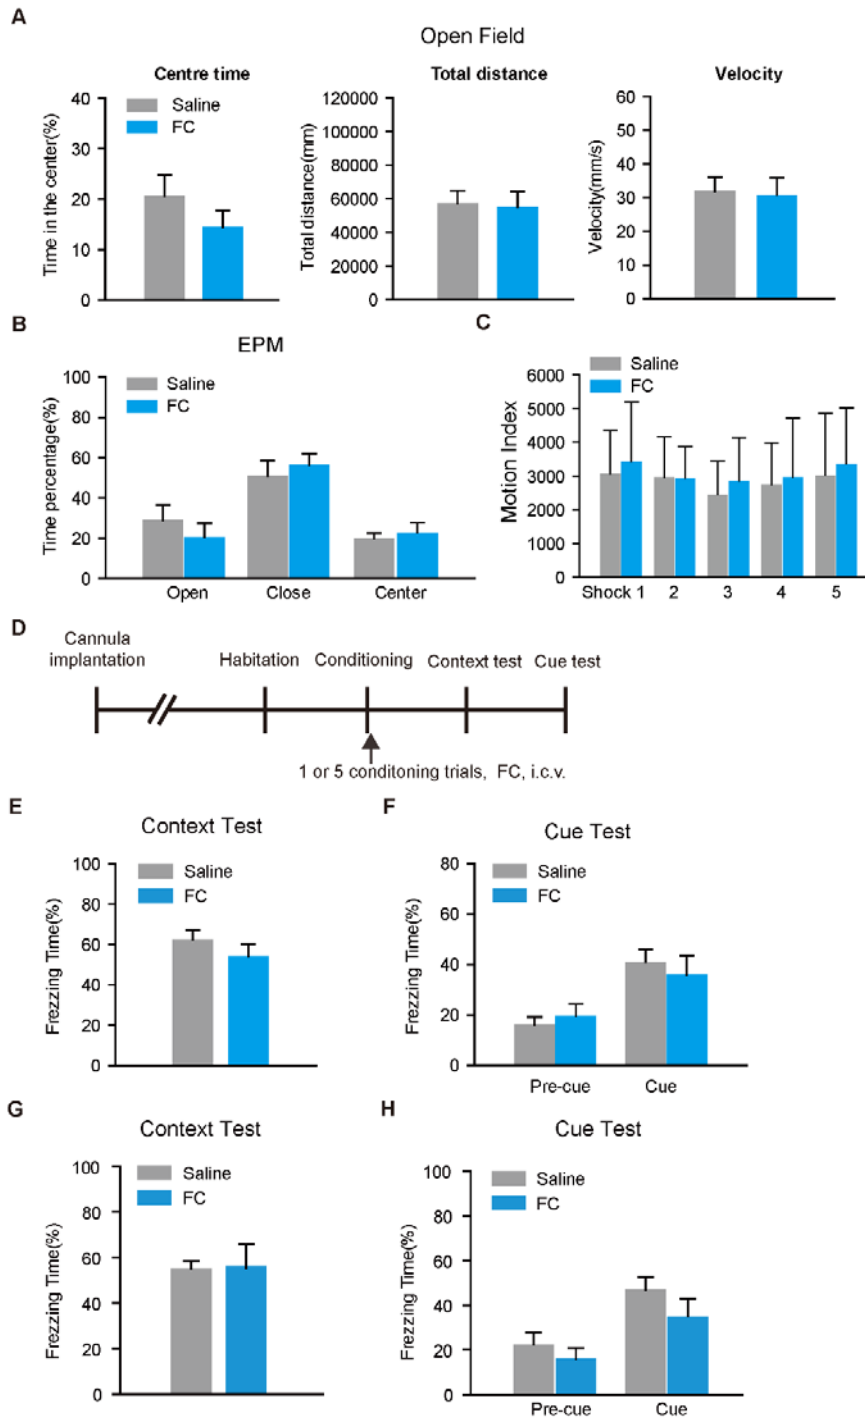

**Figure S2.** The effects of fluorocitrate on anxiety and depression-like behaviors, and fear memory consolidation. **(A)** Fluorocitrate did not change locomotor activity in open field test ( $t$ -test,  $p > 0.05$ ). **(B)** Fluorocitrate did not affect the time spent in all areas of EPM (two-way ANOVA,  $p = 0.481$ ). **(C)** Fluorocitrate did not significantly change motion sensitivity to each shock during fear conditioning (two-way RM ANOVA,  $p > 0.05$ ). **(D-H)** Fluorocitrate had no significant effects on fear memory consolidation following a single CS-US training (**E, F**) or five CS-US paired trainings (**G, H**).

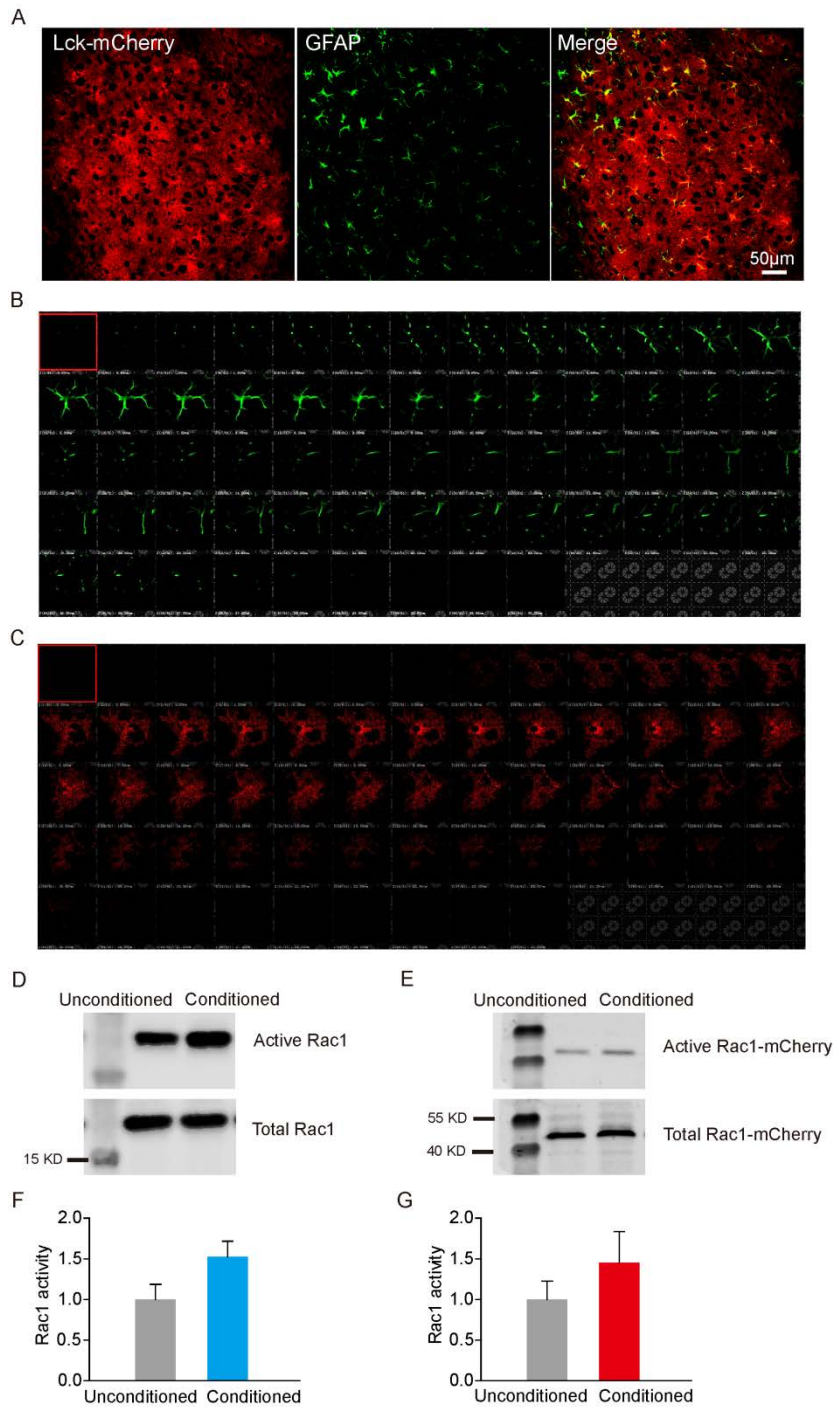

**Figure S3.** Fear conditioning induced reduced astrocytic volume and Rac1 activity in basolateral amygdala. **(A)** Colocalization of Lck-mCherry and GFAP in the BLA astrocytes. **(B, C)** A representative image of a multiple scanned astrocyte expressing GFAP **(B)** and Lck-mCherry **(C)**. **(D-G)** Following fear conditioning at 24 h, both total **(D, F)** and astrocytic Rac1 activity **(E, G)** showed no significant difference to the unconditioned group ( $t$ -test,  $p > 0.05$ ).

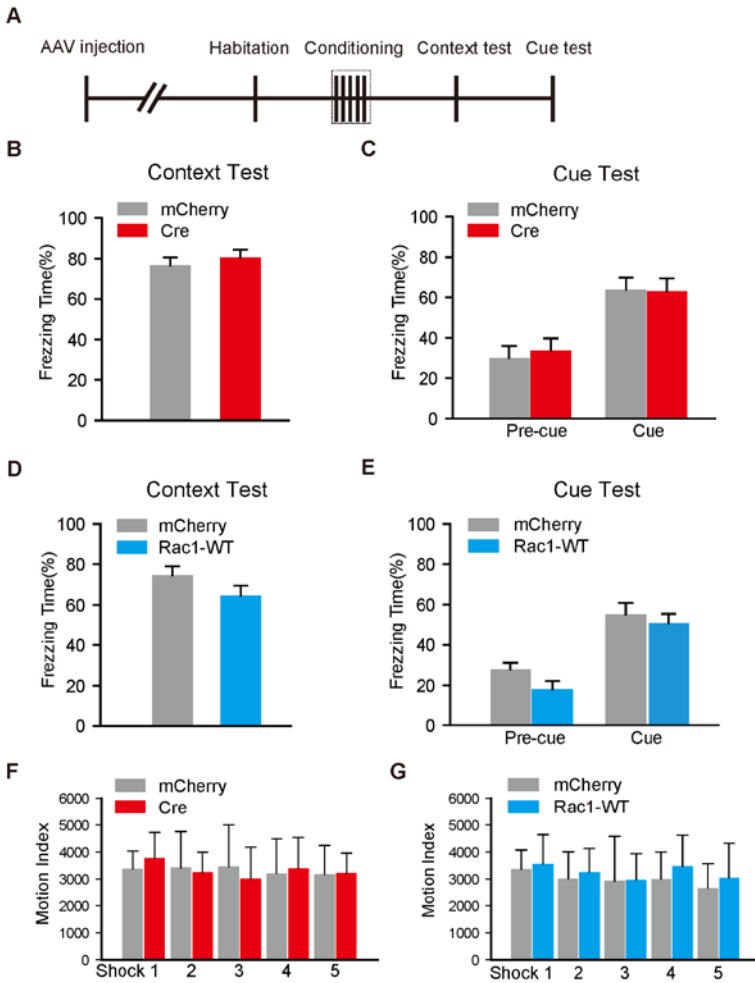

**Figure S4.** Rac1 knockout or overexpression in BLA astrocytes had no effect on long-term fear memory following five CS-US paired conditioning trials. **(A)** Experimental design. **(B, C)** Ablation of astrocytic Rac1 made no differences in contextual (**B**, *U*-test,  $p = 0.439$ ) and cued fear memory (**C**, two-way RM ANOVA,  $p = 0.564$ ). **(D, E)** Overexpression of astrocytic Rac1 also produced no effects on contextual (**D**, *t*-test,  $p = 0.144$ ) and cued fear memory (**E**, two-way RM ANOVA,  $p = 0.268$ ). **(F, G)** Knockout or overexpression of Rac1 did not change motion sensitivity to each shock during the conditioning trials (**F**, two-way RM ANOVA,  $p = 0.320$ ; **G**,  $p = 0.957$ ).

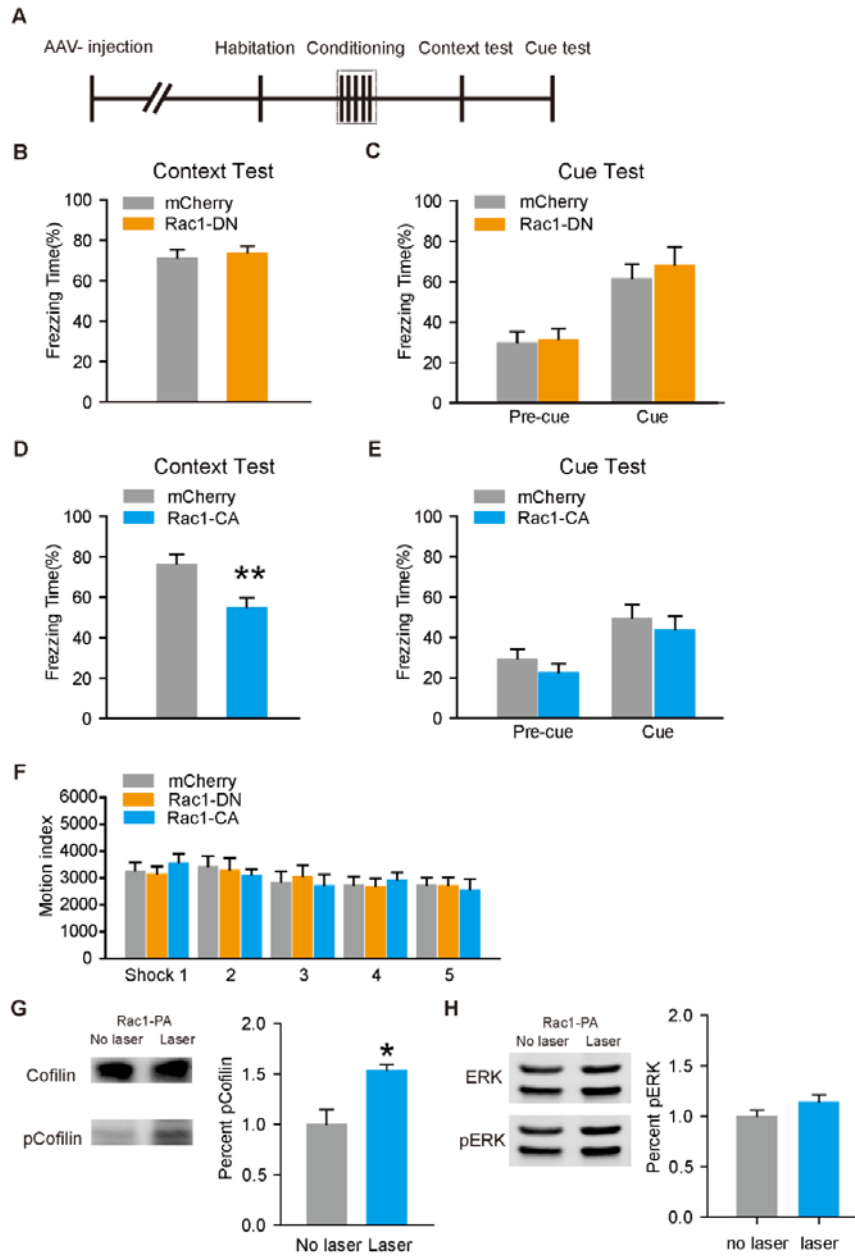

**Figure S5.** Constitutive activation of Rac1 in BLA astrocytes following five CS-US paired conditioning trials impaired contextual fear memory, while had no effects on cued fear memory. **(A)** Experimental design. **(B, C)** Overexpression of Rac1-DN in BLA astrocytes had no differences in contextual **(B, *t*-test,  $p = 0.621$ )** and cued fear memory **(C, two-way RM ANOVA,  $p = 0.341$ )**. **(D, E)** Overexpression of Rac1-CA in BLA astrocytes impaired contextual fear memory **(D, *t*-test,  $p < 0.01$ )**, but produced no effects on cued fear memory **(E, two-way RM ANOVA,  $p = 0.909$ )**. **(F)** Overexpression of Rac1-DN and Rac1-CA had no effects on motion sensitivity to each shock during fear conditioning trials. **(G and H)** Photoactivation of Rac1 significantly up-regulated p-Cofilin **(G, *t*-test,  $p = 0.026$ )** while had no effects on nonrelated proteins such as p-ERK **(H)**. \* $p < 0.05$ , \*\* $p < 0.01$ .
